## **Effect of buspirone on the H-reflex in acute spinal decerebrated mice.**

**Yann Develle and HuguesLeblond**

Department of Anatomy and CogNAC Research Group, Université du Québec à Trois-Rivières (UQTR), 3351 Boul. des Forges, C.P. 500, Trois-Rivières, Québec, Canada G9A 5H7

**Running title:** Buspirone effect on the H-reflex

**Key words:** serotonin, 5HT<sub>1A</sub> receptor agonist, spinal cord injury

**Table of content category:** Neuroscience – behavioural/systems/cognitive

### **Corresponding author:**

HuguesLeblond, PhD

Department of Anatomy

CogNAC Research Group

Université du Québec à Trois-Rivières

3351 boul. des Forges, C.P. 500

Trois-Rivières, QC, Canada G9A 5H7

Ph.: 819-376-5011 Ext. 3306

E-mail: [hugues.leblond@uqtr.ca](mailto:hugues.leblond@uqtr.ca)

## KEY POINTS SUMMARY

- Buspirone, a partial serotonergic agonist (5HT<sub>1A</sub>), exerts a considerable acute facilitation of spinally-mediated locomotion after a complete spinal lesion in mice.
- Since locomotion is associated with reflex modulation, we focused in this study on the effect of buspirone on H-reflex in acute spinal mice after decerebration and removal of anesthesia.
- Buspirone injection resulted in a depression of the H-reflex during the first 20 minutes followed, 40 minutes later, by an increase of the reflex.
- The H-reflex increase is not due to a disinhibition since buspirone had no effect on the frequency dependent depression (FDD) of the H-reflex.
- The use of a model of adult decerebrate mouse with complete spinal cord injury allows to establish that buspirone has a biphasic effect on the H-reflex and that the inhibitory action on sensory information concurs with an excitatory action on locomotion.

## ABSTRACT

Pharmacological treatment facilitating locomotor expression also modulates reflex expression through the re-arrangement of spinal networks. Buspirone, a partial serotonin receptor agonist (5-HT<sub>1A</sub>), was recently shown to facilitate and even trigger locomotor movements in mice after complete spinal lesion (Tx). Here, we studied its effect on the H-reflex after acute Tx in adult mice. To avoid possible impacts of anesthetics on H-reflex depression, experiments were performed after decerebration in un-anesthetized mice (N=13). The H-reflex in plantar muscles of the hind-paw was recorded after tibial nerve stimulation 2 h after Tx at the 8<sup>th</sup> thoracic vertebrae. Average H/M ratio was compared before and every 10 min after buspirone (8 mg/kg, i.p.) for 60 min. Frequency-dependent depression (FDD) of the H-reflex was assessed before and 50 min after buspirone. Before buspirone, a stable H-reflex could be elicited in acute spinal mice and FDD of the H-reflex was observed at 5Hz (68%) and 10Hz (70%) relative to 0.2Hz. After buspirone, the H/M ratio was initially significantly decreased to 69% of pre-treatment. It then increased significantly 30 to 60 min after exposure to buspirone, reaching 170% 60 min after injection. FDD 50 min after buspirone was not significantly different that FDD without treatment. Altogether results suggest that the reported pro-locomotor effect of buspirone occurs at a time where there is a reflex depression followed by a second phase marked by enhancement of reflex excitability, denoting functional inhibitory control.

**Abbreviations:** 5-HT: 5-Hydroxytryptamine; 5-HT<sub>1A</sub>: 1A subunit in 5-Hydroxytryptamine receptor; 8-OHDPAT: 8-Hydroxy-2-DI-n-Propylamino-Tetraline; CPG Central Pattern Generator; EMG: electromyographic; FDD: Frequency Dependent Depression; GABA: Gamma-Aminobutyric-Acid; TASK-1 acid-sensitiv-K-1; Tx: complete transection.

## INTRODUCTION

During locomotion, afferent inputs from the hind limbs serve to control the excitability of spinal networks. They adjust motor output by direct impact on either motoneurons or interneurons, comprising those of the central pattern generator (CPG) that is responsible for locomotion (Rossignol,2006). After complete spinal cord injury, sensory feedback becomes the only source of input remaining to the spinal cord: it has the power to re-arrange spinal circuits below the lesion, as shown by the positive outcome of treadmill training in adult cats (Barbeau and Rossignol,1987, Belanger et al.,1996, Lovely et al.,1986), rats (Edgerton et al.,1997, Ichiyama et al.,2008, Ootoshi et al.,2009) and mice (Leblond et al.,2003). The plasticity involved in this recovery of locomotion necessarily entails changes in several reflex pathways (Côté and Gossard,2004, Côté et al.,2003).

In spinal animals, pharmacological treatments that mimic neurotransmitters from severed, descending fibers also have neuromodulator effects on locomotor networks and can improve recovery of locomotion (Chau et al.,1998a, b). As is the case with locomotor training, drugs that enable functional recovery also regulate spinal reflexes (Côté et al.,2003, Frigon et al.,2012). For example, in cats with complete spinal lesion, the noradrenergic agonist clonidine, which is known to trigger hind limb locomotion (Barbeau and Rossignol,1987), was also found to modify spinal neuron responses to peripheral inputs (Barbeau and Rossignol,1987, Chau et al.,1998a, Côté et al.,2003, Frigon et al.,2012). In rodents, serotonergic (5-HT) drugs are effective in triggering and facilitating locomotion after complete spinal lesion (Schmidt and Jordan,2000, Slawinska et al.,2014). Recent work in our laboratory has established that treatment with the US Food and Drug Administration-approved 5-HT<sub>1A</sub> receptor partial agonist buspirone (Loane and Politis,2012) can initiate locomotion in the hind limbs of adult mice immediately after complete spinal lesion (Jeffrey-Gauthier et al.,2017). As drugs with pro-locomotor properties also modify reflex pathways, buspirone may alter reflex excitability in mice after complete spinal lesion.

The effects of 5-HT<sub>1A</sub> agonists on spinal reflexes have been tested earlier in different animal models, but there is still no consensus today as to whether the outcome is excitatory or inhibitory. On the one hand, *in vitro* results on isolated brainstem and spinal cord in

neonatal rats indicate that buspirone decreases monosynaptic reflex excitability (Yomono et al.,1992). This observation concurs with other studies that have demonstrated 5-HT<sub>1A</sub> receptor inhibition in reflex pathways (Crick et al.,1994, Hasegawa and Ono,1996a, Hasegawa and Ono,1996b, Honda and Ono,1999, Nagano et al.,1988). On the other hand, some have reported excitatory effects of 5-HT<sub>1A</sub> (Clarke et al.,1996), mainly by showing facilitatory effects on motoneuron depolarization (Grunnet et al.,2004, Perrier et al.,2003, Takahashi and Berger,1990, Zhang,1991) or monosynaptic reflex enhancement (Honda and Ono,1999). Is it possible that substances with excitatory effects on locomotion also have inhibitory effects on spinal cord excitability?

The present study was performed with a newly-developed model of decerebrated mice and was designed to investigate the modulation of reflex pathways in the absence of pharmacological anesthesia. This was required, since locomotion involves wide re-organization of reflex pathways, as shown mainly in decerebrated cat preparations in which new relays were described in the absence of anesthesia (McCrea,2001). Some reflex pathways are thus state-dependent, meaning that they occur only when the CPG is driving locomotion or when drugs known to trigger locomotion are given (Gossard et al.,1994, Leblond et al.,2000, Leblond et al.,2001, Perreault et al.,1995).

Here, the main objective is to assess the effect of buspirone, at a dose level that triggers locomotion, on H-reflex amplitude in adult decerebrated mice after acute spinal cord lesion. This reflex, the electrical analog of the tendon tap reflex, is primarily mediated by monosynaptic pathways (Misiaszek,2003). The results show a biphasic effect of buspirone on the H-reflex: its amplitude is first decreased significantly, then increased significantly, starting 30 min after drug administration. This increase is still evident 60 min after buspirone and is not associated with any significant changes in frequency-dependent depression (FDD) of the H-reflex. Some of these results have been presented in abstract form (Develle and Leblond,2016).

## METHODS

### *Animal care and ethics*

Experiments were performed on 13 C57 mice, of either sex (Charles River Laboratories, Saint-Constant, Québec, Canada), weighing 20 to 30g. Their living conditions were strictly controlled by laboratory and facility staff. They were housed in cages with food and water available *ad libitum*. All manipulations and procedures were in accordance with Canadian Council on Animal Care guidelines and were approved by the Université du Québec à Trois-Rivières Animal Care Committee. The mice were randomly assigned to 1 of 2 groups in acute, terminal experiments to evaluate the effect of buspirone on the H-reflex: a test group (n=8) exposed to buspirone and controls (n=5) treated with saline.

### *Anesthesia*

All surgeries were performed under isoflurane anesthesia (2% mixed with O<sub>2</sub> 95% and CO<sub>2</sub> 5%, 200 ml/min). General anesthesia was first induced through a mask: then, the animals were tracheotomized to maintain anesthesia and allow artificial ventilation (SAR-830/P Ventilator, CWE, Inc., Ardmore, PA, USA) adjusted to preserve expired CO<sub>2</sub> level between 3 and 4% (CapStar-100 CO<sub>2</sub> monitor, CWE, Inc.). Body temperature was monitored by rectal probe and maintained at 37±0.5°C with heating pad.

### *Spinalization*

The objective was to measure the H-reflex after complete spinal cord section. It was performed early in the surgery to minimize the impact of the decerebration on the spinal circuitry. The paravertebral muscles were cleared from both vertebral laminae after skin incision targeting the 8<sup>th</sup> thoracic vertebra. Then, double laminectomy exposed the spinal cord at this level. After perforation of the dura mater with a needle, a small piece of lidocaine-soaked cotton (xylocaine 2%) was applied for 1min to prevent uncontrolled secondary neural damage or lumbar spinal cord excitotoxicity. Then, the spinal cord was transected with

micro-scissors and confirmed by visual observation of the gap between the rostral and caudal stumps. Finally, Surgicel<sup>®</sup> absorbable hemostat (Ethicon, Johnson & Johnson, USA) was inserted between the 2 parts of the spinal cord before the skin was sutured.

### *Decerebration*

Spinal network activities are traditionally assessed in decerebrate preparations, especially from cats, rats and rabbits, with recent adaptation to mice (Dobson and Harris,2012, Meehan et al.,2012, Meehan et al.,2017). Data were, therefore, acquired in decerebrated, unanesthetized mice to avoid the unwanted effects of anesthesia. The carotid arteries were first ligated to minimize cerebral perfusion while the animals were secured in a stereotaxic frame (Model 980 Small Animal Spinal Unit, Kopf Instruments, Tujunga, CA,USA) equipped with a small mouse and neonatal rat adaptor (StoeltingCompany, Wood Dale, IL, USA). They were then craniotomized, taking care to leave the superior sagittal sinus intact. Bone wax (Ethicon, Johnson & Johnson, USA) was applied to the skull when necessary to prevent bleeding. The Dura mater was removed gently to expose the cortex for transection with a razor blade 1mm rostral to the lambda. The rostral part of neural tissue and the occipital cortex were removed, by gentle suctioning with an adapted micro-vacuum, corresponding to pre-collicular-pre-mamillar decerebration. The cavity was finally filled with Gelfoam<sup>®</sup> thin soak hemostat sponge (Pfizer Inc, New York, NY, USA), and the skin was closed with suture.

### *H-reflex recording*

After decerebration, the left hind limb was fixed in extension and an incision was made on top of the gastrocnemius muscles to separate and expose the tibial nerve. A pool was formed with skin flaps and filled with mineral oil to avoid nerve desiccation. The tibial nerve was mounted on a home-made bipolar hook electrode for stimulation. One-ms single-pulsed stimulations were delivered by a constant-current stimulator (Model DS4, Digitimer

Ltd., Welwyn Garden City, UK) triggered by a computer-controlled sequencer (Power 1401 acquisition system, Cambridge Electronic Design, Cambridge, UK).

Paired, fine, multistrained stainless steel wires (AS631Cooner Wire, Chatsworth, CA, USA) were inserted under the skin, between the 2<sup>nd</sup> and 3<sup>rd</sup> medial toes, towards the intrinsic foot muscles, for electromyographic (EMG) recording. Signals were amplified 1,000x, bandpass-filtered at 30-3,000Hz (Grass P55 AC Preamplifier, Natus Neurology, Inc., Pleasanton, CAUSA), and digitized for data acquisition (Spike 2 software, Cambridge Electronic Design, Cambridge, UK). A ground electrode was inserted in the skin between the stimulating and recording electrodes.

Anesthesia was stopped, followed by 60-min rest, which corresponds to approximately 120-150 min post-spinalization, to avoid undesirable anesthesia-induced effects.

#### *Buspirone administration*

The H-reflex was compared in groups of mice that received buspirone or saline. A catheter was inserted to facilitate i.p. administration without moving the animals. Buspirone (8mg/kg,i.p.) was given in a volume of 0.1cc, with the controls receiving the same amount of saline (0.9%).

#### *Data acquisition and analysis*

Stimulus-response curves (e.g. Fig. 1B) were charted by gradually increasing tibial nerve stimulation intensity to ascertain the maximal H-reflex (4-6 ms latency) concomitant with stable M-wave (1-3 ms latency). At this intensity, which corresponded to approximately 1.8 times the motor threshold, Ia muscle spindle afferents were mainly activated. Responses to tibial nerve stimulation intensity were recorded before and every 10 min after the injection, for a total of 60 min. It allowed us to observe the evolution of reflex amplitude with time and treatment.



Spinal inhibitory processes were also tested before and 60 min after injection by varying stimulation frequency between 4 blocks of 30 stimulations (0.2, 5, 10 and 0.2 Hz; 60s inter-block interval) to assess FDD. The first 5 responses of each block were discarded to allow H-reflex stabilization. Analyses comprised only recordings with stable M-wave throughout the protocol (<10% variation) to ensure recording stability. Note that, as illustrated in Figure 1A (bottom trace), some responses included a third deflection with longer latency beginning about 7-8 ms post-stimulation. This response was poorly depressed by stimulation frequency, in contrast to the response localized between 4 to 6 ms, and was not taken into account in H-reflex measurement.

Data were analyzed with Spike2 software (Cambridge Electronic Design) and Excel software (Microsoft Corporation, Redmond, WA, USA). Peak-to-peak amplitudes of the H-reflex and M-wave were measured to establish the H/M ratio so that the results could be compared between animals. Mean ratio at each time point was computed by averaging 30 stimulations at 0.2Hz. In the FDD protocol, mean H/M ratio was averaged from 25 successive responses for each block.

Statistical analysis was conducted with Statistica software (version 13, Statsoft Inc., Tulsa, OK, USA), and the significance threshold was set at  $p \leq 0.05$ . Normal distribution was assessed by the Kolmogorov-Smirnov test. Then, Greenhouse-Geisser-corrected 2-way ANOVA ascertained the effects of the intra-subject factor *time* and the inter-subject factor *treatment* on reflex amplitude. *Post hoc* Student's t-test targeted periods presenting significant variations in comparison to pre-injection values. Finally, FDD at 60 min post-injection in buspirone-injected animals was tested by 2-way ANOVA to compare with inhibition in the pre-injection state.

## RESULTS

Buspirone administration decreased spinal cord excitability in the first 20 min, followed by its increase 40 min later. This finding was indicated by reduction of H-reflex peak-to-peak amplitude early after treatment, followed by augmentation 40 min later.

### *H-reflex in acute spinal decerebrated mice*

Stimulus-response curves were recorded for each mouse to establish at which intensity the H-reflex should be evoked to test the effect of buspirone. Typical examples of the H-reflex and stimulus-response curves are depicted in Figures 1A and 1B, respectively. Stimulation intensity was increased progressively until the whole pool of fibers in the tibial nerve was recruited, as indicated by a plateau being reached in the M-wave in Figure 1B. The H-reflex was usually evoked close to the motor threshold, and after an initial rise, it too plateaued and did not manifest a classical decrease after reaching maximum. This pattern was observed in all animals (N=13). Stimulation intensity was selected so that stable M-wave could be evoked as near as possible to beginning of the plateau (1.4T in the example depicted in Figure 1B).

### *Buspirone effect on the H-reflex*

Figure 2A displays H-reflex raw traces averaged from 30 stimulations recorded from intrinsic foot muscles before, 10 and 40 min after buspirone administration in 1 mouse. Average H-reflex decreased dramatically in this mouse 10 min after buspirone (grey trace), then increased considerably 40 min later (dotted trace).

Figure 2B illustrates that the H/M ratio (normalized to T0) changes over time in the buspirone but not in the saline group. In all groups combined, Greenhouse-Geisser-corrected 2-way ANOVA of the factors time and treatment indicated reflex amplitude variation over time (main effect:  $F_{6,64} = 2.71, p = 0.020$ ). Moreover, this effect of time was associated with the *treatment* applied ( $F_{6,64} = 3.61, p = 0.004$ ). Indeed, *posthoc* Student t-test first shows reflex amplitude being decreased by 31% by buspirone at T10, significantly different from T0 values ( $p = 0.012$ ). This reflex inhibition was still significantly different at T20 ( $p = 0.040$ ). Then, a transition phase led to a significant 48% increase of the H/M ratio from 40 min ( $p = 0.009$ ) that plateaued at 60 min (T0-T50,  $p = 0.036$ , and T0-T60,  $p = 0.031$ ). In contrast, *post*

*hoc* test ingrevealed no significant differences in the saline-injected group over time ( $p > 0.05$ ).

### *FDD of the H-reflex*

The H-reflex was characterized by frequency-dependent behavior. As stimulation frequency was increased from 0.2 to 10 Hz, reflex amplitude was depressed in intact and acute spinal animals. Figure 3A is a typical example of FDD of the H-reflex in a mouse before buspirone treatment: higher frequency of stimulation at 5 or 10 Hz almost completely abolished the H-reflex. Figure 3B shows inhibition at 5 and 10 Hz in all buspirone-treated animals as reflex amplitude normalized to values obtained at 0.2 Hz frequency. Our results reflect significant reflex inhibition, depending on stimulation frequency (2-way ANOVA:  $F_{1,36} = 438$ ,  $p < 0.001$ ). Modulation of recorded reflex amplitude tended to be increased by treatment at 60 min post-dose (66.6% at 5 Hz and 68.9% at 10 Hz at pre-dose versus 78.6% at 5 Hz and 75.8% at 10 Hz 60 min post-dose). However, the difference was not significant, since statistical analysis did not detect any effect of treatment on the amplitude of frequency-dependent inhibition (2-way ANOVA:  $F_{1,36} = 0.73$ ,  $p = 0.408$ ).

## **DISCUSSION**

The use of adult decerebrated mouse preparations allowed us to study the effect of buspirone on the H-reflex after acute spinal lesion in a system that was not altered by the presence of anesthetic drugs. The main study result was that buspirone had a depressive impact on H-reflex amplitude for the first 20 min after drug administration. This depressive outcome was then attenuated and even reversed to an increased effect on the H-reflex which became significant 40 min post-dose. Since FDD at 5 and 10 Hz remained similar to the pre-dose condition, the reflex enhancement observed at 40 min did not seem to be attributed to loss of inhibitor control.

### *Buspirone act as a 5HT<sub>1A</sub>receptor agonist on the reflex*

Buspirone is a selective partial agonist of 5-HT<sub>1A</sub> receptors with some affinity for dopaminergic D2 receptors (Loane and Politis,2012). Since it has been shown that motoneuronal excitability is not affected by either D2 agonist or antagonist (Han et al.,2007, Han and Whelan,2009), we assume that the effect observed in our experiment on the H-reflex with buspirone is mainly associated with 5-HT<sub>1A</sub> receptors (see also D'Amico *et al*, 2017). Even if this reflex is mainly of monosynaptic nature, it remains under the control of different elements (Misiaszek,2003). The 5-HT<sub>1A</sub> receptors can be found at various locations on these elements including presynaptic, intrasynaptic and even outside the synaptic innervation. This heterogeneity probably explain why 5-HT have such multiple and opposite effects on motor circuits of the spinal cord, as recently elegantly reviewed in Perrier and Cotel (2015).

The short-term impact of buspirone observed in our experiments, i.e reflex reduction, concurs with the literature on the effect of 5-HT<sub>1A</sub> agonists. Indeed, monosynaptic reflex reduction has been shown with the 5-HT<sub>1A</sub> agonist 8-OHDPAT in rats with complete spinal lesion under  $\alpha$ -chloralose or urethane anesthesia (Hasegawa and Ono,1996a, Honda and Ono,1999, Nagano et al.,1988). More recently, (D'Amico et al.,2017) used buspirone as 5HT<sub>1A</sub> agonist and showed that its systemic administration in awake humans reduces about 30% of F-wave amplitude, indicating direct decrease in motoneuron excitability and output.

Because 5-HT<sub>1A</sub> receptors are mainly present on dorsal laminae of the spinal cord, it was proposed to be also involved in afferent regulation (Giroux et al.,1999, Noga et al.,2009). Such participation in afferent modulation by 5-HT<sub>1A</sub> receptors has been confirmed by (Hasegawa and Ono,1996b) in rats. They showed that monosynaptic reflexes evoked by dorsal root stimulation are depressed by 8-OHDPAT administration with no change in motoneuronal excitability. This suggests that reflex depression is induced by lowering neurotransmitter release at the presynaptic level. Such afferent regulation could be generated by 5-HT<sub>1A</sub> receptors on afferent neurons and could be responsible for increased GABA-mediated inhibition (Gharagozloo et al.,1990).

*The absence of anesthesia and reversal from inhibitory to excitatory effects of buspirone*

A reversal of the effect buspirone (or any other 5HT<sub>1A</sub> agonist) from inhibitory to excitatory later post-treatment has not been reported so far. Such differences with previous experiments could be related to the use of decerebrated preparations and the absence of anesthesia (Meehan et al.,2017) that affect reflex modulation (Ho and Waite,2002) see also (Schmidt and Jordan,2000). Indeed, for example, experiments on decerebrated cats disclosed reversal of group I autogenetic inhibition to polysynaptic excitation in extensor motoneurons after exposure to clonidine or L-DOPA, drugs that promote locomotion in spinal cats (Conway et al.,1987, Gossard et al.,1994). Interneurons involved in this reflex reversal are shared with CPGs and supraspinal inputs (Leblond et al.,2000, Leblond et al.,2001).

Low threshold stimulation like the one used in the present study might also activate oligosynaptic pathways by some other large-diameter afferent fibers, such as type Ib afferents, that are also in contact with motoneurons. Because such depolarization involves the polysynaptic circuitry, the motor response would have longer delay and may be dissociated from monosynaptic activation (e.g. Figure 1A, bottom trace). Still, long-lasting effects on motoneurons by these pathways are not to be excluded and could be implicated in signal amplitude recorded by EMG.

Indeed, the absence of anesthesia most likely allowed otherwise quiescent spinal networks to be active and participate in the modulation of membrane conductance, affecting motoneuronal responsiveness (Harvey et al.,2006a, b, Li et al.,2006, Murray et al.,2010) see also (D'Amico et al.,2014). However, slowly-activated currents, like persistent inward currents, required long-duration input and could not be fully actuated by brief stimulations like the ones used in our study (Murray et al.,2011).

It is still not fully clear why the H-reflex was enhanced during the second phase of our experiment and this will be discussed in a later section. Nonetheless, to evaluate if this reversal from inhibition to excitation can be explained by a disinhibition, we measured FDD of the H-reflex. This inhibition is reported to mainly depend on GABA inhibitor potential (Jolivald et al.,2008, Kakinohana et al.,2006). The results showed that post-activation

inhibitory circuitry remained unchanged between pre-dose and 60 min post-dose in our experiment, suggesting that disinhibition or changes in GABAergic activity cannot explain the observed increase of reflex amplitude.

#### *Opposite effect of 5HT<sub>1A</sub> according to receptor location on the motoneuron*

As mentioned above, 5HT<sub>1A</sub> receptors are located at various locations that can get activated simultaneously. On the one hand, at the synaptic level, 5-HT is responsible for modulating fast-activated potassium channels via 5-HT<sub>1A</sub> receptors (Jackson and White,1990, Penington and Kelly,1990). It was shown that 5HT<sub>1A</sub> receptors inhibits TASK-1 potassium channels that would contribute to the excitatory effect of 5-HT on spinal motoneurons (Perrier et al.,2003). By lowering outward cation flux, 5-HT<sub>1A</sub> receptors shortened the refractory period and facilitated motoneuronal depolarization (Grunnet et al.,2004, Santini and Porter,2010). This mechanism augments motoneuronal excitability and enhances motor responses to synaptic stimulation. On the other hand, there are extrasynaptic5-HT<sub>1A</sub> receptors that can be activated by spill-over during high 5-HT release at the synaptic level or background concentration of 5-HT (e.g. in systemic administration) that are known to be inhibitory. Indeed, 5-HT<sub>1A</sub> receptor stimulation on axon hillocks elicits inhibition of sodium channels that are responsible for initiation of action potentials in motoneurons (Cotel et al.,2013, Perrier and Cotel,2015, Perrier et al.,2013, Petersen et al.,2016). This inhibition decreases the number of spikes triggered and consequently reduce the amplitude of the EMG.

Thus, when large dose of buspirone is given, as in our experiments, 5-HT<sub>1A</sub> receptors inhibit motoneuron output and decrease reflex amplitude through activity at the axon hillock sites even if there is an excitation at the synaptic level. This dual effect of 5-HT<sub>1A</sub> receptors on motoneuronal excitability may be involved in the observed biphasic effect of buspirone over time on reflex amplitude through a switch in dominance of receptor type activity.

Indeed, drug action is concentration-dependent, and buspirone pharmacokinetics undergoes a biphasic elimination cycle (Sethy and Francis,1988). The first half-life of the

drug is reached after 24.8 min, a period that matches the transition phase of reflex amplitude in treated animals. Also, synaptosomes, the main structures implicated in 5-HT re-uptake in synapses (Henn and Hamberger,1971), are not present at the axon hillock level. This region relies mainly on the participation of astrocytes that have been demonstrated to be involved in 5-HT re-uptake, especially at the extrasynaptic level (De-Miguel et al.,2015, Henn and Hamberger,1971, Kimelberg and Katz,1985, Ritchie et al.,1981). Such region-dependent differences in the 5-HT clearance mechanisms could explain the biphasic effect of buspirone on reflex amplitude over time. Moreover, a desensitization of 5-HT<sub>1A</sub> receptors after their pharmacological activation have been reported and should be considered as well in that reversal (Seth et al.,1997).

#### *Reflex inhibition concomitant with excitatory effect on locomotion*

Despite its initial inhibitory effect on the H-reflex shown in the present study, it was shown that buspirone promotes locomotor movements after spinal cord injury. Indeed, in another experiment from our laboratory it was shown that buspirone exerts a considerable acute facilitation of spinally-mediated locomotion in mice after a complete section of the spinal cord (Jeffrey-Gauthier et al.,2017). Buspirone was also shown to potentiate locomotion when combined with other treatments (Gerasimenko et al.,2015, Ung et al.,2012). It indicates that locomotion can be triggered during depression of sensorimotor excitability induced by buspirone. This paradox is also observed with the 5-HT<sub>1A</sub> partial agonist 8-OHDPAT, which is known to inhibit the monosynaptic reflex (Hasegawa and Ono,1996a, Honda and Ono,1999, Nagano et al.,1988) and can facilitate recovery of locomotor function in spinal rats (Antri et al.,2005, Antri et al.,2003). Sensory inputs provided by the treadmill seem sufficient to initiate and maintain locomotor rhythm with buspirone. The same observation was made in cats where clonidine, a noradrenergic agonist that can trigger locomotion on a treadmill after a complete spinal lesion, reduce reflexes evoked by stimulation of the dorsum of the foot (Barbeau and Rossignol,1987, Chau et al.,1998a).

These observations with adult animals that walk on a treadmill seem to disagree with results obtained during fictive locomotion in neonatal rodents where 5HT<sub>1A</sub> was reported to have an inhibitory effect on the spinal rhythmic activity (Beato and Nistri,1998, Dunbar et al.,2010, Liu and Jordan,2005, Pearlstein et al.,2005). For example, in the brainstem-spinal cord of neonatal mice, 5-HT release during fictive locomotion was enhanced by citalopram, a selective re-uptake inhibitor, and a decreased burst duration and amplitude was observed (Dunbar et al.,2010). Since selective 5-HT<sub>1A</sub> and 5-HT<sub>1B</sub> antagonists reversed the inhibitory effect of citalopram, it was concluded that these receptors may rather be involved in rhythm inhibition. A similar conclusion has been drawn with neonatal rats where blocking 5-HT<sub>1A/1B</sub> receptors during motor activity, produced by brainstem stimulation, induced speed-up of the rhythm (Liu and Jordan,2005). In both these studies, locomotor speed was impaired by 5-HT<sub>1A</sub> receptor but the alternate pattern of locomotor rhythm was not blocked.

This discrepancy between results obtained during fictive locomotion or locomotion over a treadmill, when there is some exteroceptive stimulation, suggest that sensorimotor control is fundamental to the pro-locomotor effect of buspirone. Many studies employing different methodologies to induce locomotion have disclosed that reflex modulation is associated with locomotor expression (Frigon et al.,2012, Grillner and Shik,1973, McCrea,2001). Similarly, buspirone treatment induces spinal reflex re-organization and promotes locomotor activity.

### *Conclusion*

In summary, even if the role of 5-HT on motoneuron excitability has been extensively studied for more than fifty years, our knowledge is still scarce on how this neuromodulator contribute to sensorimotor control. The heterogeneity of 5-HT receptors locations (pre-, intra- or extra-synaptically) make it really difficult to assess the outcome of a treatment with this neuromodulator after a complete spinal cord injury. Reflecting this heterogeneity, buspirone, if given at a dose that can trigger locomotion, was shown to have biphasic



consequence on the H-reflex in time after an acute lesion of the spinal cord, starting with an early and acute inhibition, followed by an excitation of the reflex.

## **COMPETING INTERESTS**

The authors declare no competing interests and no relationship that may lead to any conflict of interest.

## **AUTHOR CONTRIBUTIONS**

Y.D.: designed the study, conducted the experiments, acquired data, analysed data, and wrote the manuscript. H.L.: conceived and designed the study; acquired data, analysed data, and wrote manuscript; obtained funding for this work. All authors have approved the final version of the manuscript and agree to be accountable for all aspects of the work. All persons designated as authors qualify for authorship, and all those who qualify for authorship are listed.

## **FUNDING**

This work was funded by the Natural Science and Engineering Research Council (NSERC) of Canada (Grant 05403-2014 to H.L.).

## **ACKNOWLEDGEMENTS**

Y.D. was supported by studentship from Université du Québec à Trois-Rivières (Department of Anatomy).

## **REFERENCES**

**Antri M, Barthe JY, Mouffle C, and Orsal D.** Long-lasting recovery of locomotor function in chronic spinal rat following chronic combined pharmacological stimulation of serotonergic receptors with 8-OHDPAT and quipazine. *Neurosci Lett* 384: 162-167, 2005.

**Antri M, Mouffle C, Orsal D, and Barthe J.** 5-HT 1A receptors are involved in short- and long-term processes responsible for 5-HT-induced locomotor function recovery in chronic spinal rat. *Eur J Neurosci* 18: 1963-1972, 2003.

**Barbeau H and Rossignol S.** Recovery of locomotion after chronic spinalization in the adult cat. *Brain Res* 412: 84-95, 1987.

**Beato M and Nistri A.** Serotonin-induced inhibition of locomotor rhythm of the rat isolated spinal cord is mediated by the 5-HT<sub>1</sub> receptor class. *Proc Biol Sci* 265: 2073-2080, 1998.

**Belanger M, Drew T, Provencher J, and Rossignol S.** A comparison of treadmill locomotion in adult cats before and after spinal transection. *J Neurophysiol* 76: 471-491, 1996.

**Chau C, Barbeau H, and Rossignol S.** Early locomotor training with clonidine in spinal cats. *J Neurophysiol* 79: 392-409, 1998a.

**Chau C, Barbeau H, and Rossignol S.** Effects of intrathecal  $\alpha$ <sub>1</sub> and  $\alpha$ <sub>2</sub>-noradrenergic agonists and norepinephrine on locomotion in chronic spinal cats. *J Neurophysiol* 79: 2941-2963, 1998b.

**Clarke RW, Harris J, and Houghton AK.** Spinal 5-HT-receptors and tonic modulation of transmission through a withdrawal reflex pathway in the decerebrated rabbit. *Br J Pharmacol* 119: 1167-1176, 1996.

**Conway BA, Hultborn H, and Kiehn O.** Proprioceptive input resets central locomotor rhythm in the spinal cat. *Exp Brain Res* 68: 643-656, 1987.

**Côté M and Gossard J.** Step training-dependent plasticity in spinal cutaneous pathways. *J Neurosci* 24: 11317-11327, 2004.

**Côté M, Ménard A, and Gossard J.** Spinal cats on the treadmill: changes in load pathways. *J Neurosci* 23: 2789-2796, 2003.

**Cotel F, Exley R, Cragg SJ, and Perrier J.** Serotonin spillover onto the axon initial segment of motoneurons induces central fatigue by inhibiting action potential initiation. *Proc Natl Acad Sci U S A* 110: 4774-4779, 2013.

**Crick H, Manuel NA, and Wallis DI.** A novel 5-HT receptor or a combination of 5-HT receptor subtypes may mediate depression of a spinal monosynaptic reflex in vitro. *Neuropharmacology* 33: 897-904, 1994.

**D'Amico JM, Butler AA, Héroux ME, Cotel F, Perrier JF, Butler JE, Gandevia SC, and Taylor JL.** Human motoneurone excitability is depressed by activation of serotonin 1A receptors with buspirone. *J Physiol* 595: 1763-1773, 2017.

**D'Amico JM, Condliffe EG, Martins KJB, Bennett DJ, and Gorassini MA.** Recovery of neuronal and network excitability after spinal cord injury and implications for spasticity. *Front Integr Neurosci* 8: 36, 2014.

**De-Miguel FF, Leon-Pinzon C, Noguez P, and Mendez B.** Serotonin release from the neuronal cell body and its long-lasting effects on the nervous system. *Philos Trans R Soc Lond B Biol Sci* 370: 20140196, 2015.

**Develle Y and Leblond H.** Buspirone effect on H-reflex in acute decerebrated mice. SFN 46th annual meeting, San Diego, CA, USA, 2016.

**Dobson KL and Harris J.** A detailed surgical method for mechanical decerebration of the rat. *Exp Physiol* 97: 693-698, 2012.

**Dunbar MJ, Tran MA, and Whelan PJ.** Endogenous extracellular serotonin modulates the spinal locomotor network of the neonatal mouse. *J Physiol* 588: 139-156, 2010.

**Edgerton VR, De Leon RD, Tillakaratne N, Recktenwald M, Hodqson J, and Roy RR.** Use-dependent plasticity in spinal stepping and standing. *Adv Neurol* 72: 233-247, 1997.

**Frigon A, Johnson MD, and Heckman CJ.** Differential modulation of crossed and uncrossed reflex pathways by clonidine in adult cats following complete spinal cord injury. *J Physiol* 590: 973-989, 2012.

**Gerasimenko Y, Lu D, Modaber M, Zdunowski S, Gad P, Sayenko D, Morikawa E, Haakana P, Ferguson A, Roy R, and VR. E.** Noninvasive reactivation of motor descending control after paralysis. *J Neurotrauma* 32: 1968-1980, 2015.

**Gharagozloo A, Holohean AM, Hackman JC, and Davidoff RA.** Serotonin and GABA-induced depolarizations of frog primary afferent fibers. *Brain Res* 532: 19-24, 1990.

**Giroux N, Rossignol S, and Reader TA.** Autoradiographic study of  $\alpha$ 1- and  $\alpha$ 2-noradrenergic and serotonin 1A receptors in the spinal cord of normal and chronically transected cats. *J Comp Neurol* 406: 402-414, 1999.

**Gossard JP, Brownstone RM, Barajon I, and Hultborn H.** Transmission in a locomotor-related group Ib pathway from hindlimb extensor muscles in the cat. *Exp Brain Res* 98: 213-228, 1994.

**Grillner S and Shik ML.** On the descending control of the lumbosacral spinal cord from the "mesencephalic locomotor region". *Acta Physiol Scand* 87: 320-333, 1973.

**Grunnet M, Jespersen T, and Perrier J.** 5-HT 1A receptors modulate small-conductance Ca<sup>2+</sup>-activated K<sup>+</sup> channels. *J Neurosci Res* 78: 845-854, 2004.

**Han P, Nakanishi ST, Tran MA, and Whelan PJ.** Dopaminergic modulation of spinal neuronal excitability. *J Neurosci* 27: 13192-13204, 2007.

**Han P and Whelan PJ.** Modulation of AMPA currents by D1-like but not D2-like receptors in spinal motoneurons. *Neuroscience* 158: 1699-1707, 2009.

**Harvey PJ, Li X, Li Y, and Bennett DJ.** 5-HT<sub>2</sub> receptor activation facilitates a persistent sodium current and repetitive firing in spinal motoneurons of rats with and without chronic spinal cord injury. *J Neurophysiol* 96: 1158-1170, 2006a.

**Harvey PJ, Li X, Li Y, and Bennett DJ.** Endogenous monoamine receptor activation is essential for enabling persistent sodium currents and repetitive firing in rat spinal motoneurons. *J Neurophysiol* 96: 1171-1186, 2006b.

**Hasegawa Y and Ono H.** Effect of (+/-)-8-hydroxy-2-(di-n-propylamino)tetralin hydrobromide on spinal motor systems in anesthetized intact and spinalized rats. *Eur J Pharmacol* 295: 211-214, 1996a.

**Hasegawa Y and Ono H.** Effects of 8-OH-DPAT, a 5-HT<sub>1A</sub> receptor agonist, and DOI, a 5-HT<sub>2A/2C</sub> agonist, on monosynaptic transmission in spinalized rats. *Brain Res* 738: 158-161, 1996b.

**Henn FA and Hamberger A.** Glial cell function: uptake of transmitter substances. *Proc Natl Acad Sci U S A* 68: 2686-2690, 1971.

**Ho SM and Waite PME.** Effects of different anesthetics on the paired-pulse depression of the H reflex in adult rat. *Exp Neurol* 177: 494-502, 2002.

**Honda M and Ono H.** Differential effects of (R)- and (S)-8-hydroxy-2-(di-n-propylamino)tetralin on the monosynaptic spinal reflex in rats. *Eur J Pharmacol* 373: 171-179, 1999.

**Ichiyama RM, Courtine G, Gerasimenko YP, Yang GJ, van den Brand R, Lavrov IA, Zhong H, Roy RR, and Edgerton VR.** Step training reinforces specific spinal locomotor circuitry in adult spinal rats. *J Neurosci* 28: 7370-7375, 2008.

**Jackson D and White S.** Receptor subtypes mediating facilitation by serotonin of excitability of spinal motoneurons. *Neuropharmacology* 29 787-797, 1990.

**Jeffrey-Gauthier R, Josset N, Bretzner F, and Leblond H.** Facilitation of locomotor spinal networks activity by buspirone after a complete spinal cord injury in mice. . *Submitted to J Neurotrauma* NEU-2017-5476, 2017.

**Jolivald CG, Lee CA, Ramos KM, and Calcutt NA.** Allodynia and hyperalgesia in diabetic rats are mediated by GABA and depletion of spinal potassium-chloride co-transporters. *Pain* 140: 48-57, 2008.

**Kakinohana O, Hefferan MP, Nakamura S, Kakinohana M, Galik J, Tomori Z, Marsala J, Yaksh TL, and Marsala M.** Development of GABA-sensitive spasticity and rigidity in rats after transient spinal cord ischemia: A qualitative and quantitative electrophysiological and histopathological study. *Neuroscience* 141: 1569-1583, 2006.

- Kimelberg HK and Katz DM.** High-affinity uptake of serotonin into immunocytochemically identified astrocytes. *Science* 228: 889-891, 1985.
- Leblond H, Espérance M, Orsal D, and Rossignol S.** Treadmill locomotion in the intact and spinal mouse. *J Neurosci* 23: 11411-11419, 2003.
- Leblond H, Ménard A, and Gossard JP.** Bulbospinal control of spinal cord pathways generating locomotor extensor activities in the cat. *J Physiol* 525: 225-240, 2000.
- Leblond H, Ménard A, and Gossard JP.** Corticospinal control of locomotor pathways generating extensor activities in the cat. *Exp Brain Res* 138: 173-184, 2001.
- Li X, Murray KC, Harvey PJ, Ballou EW, and Bennett DJ.** Serotonin facilitates a persistent calcium current in motoneurons of rats with and without chronic spinal cord injury. *J Neurophysiol* 97: 1236-1246, 2006.
- Liu J and Jordan LM.** Stimulation of the parapyramidal region of the neonatal rat brain stem produces locomotor-like activity involving spinal 5-HT<sub>7</sub> and 5-HT<sub>2A</sub> receptors. *J Neurophysiol* 94: 1392-1404, 2005.
- Loane C and Politis M.** Buspirone: What is it all about? *Brain Res* 1461: 111-118, 2012.
- Lovely RG, Gregor RJ, Roy RR, and Edgerton VR.** Effects of training on the recovery of full-weight-bearing stepping in the adult spinal cat. *Exp Neurol* 92: 421-435, 1986.
- McCrea DA.** Spinal circuitry of sensorimotor control of locomotion. *J Physiol* 533: 41-50, 2001.
- Meehan CF, Grondahl L, Nielsen JB, and Hultborn H.** Fictive locomotion in the adult decerebrate and spinal mouse in vivo. *J Physiol* 590: 289-300, 2012.
- Meehan CF, Mayr KA, Manuel M, Nakanishi ST, and Whelan PJ.** Decerebrate mouse model for studies of the spinal cord circuits. *Nat Protoc* 12: 732-747, 2017.
- Misiaszek JE.** The H-reflex as a tool in neurophysiology: Its limitations and uses in understanding nervous system function. *Muscle Nerve* 28: 144-160, 2003.
- Murray KC, Nakae A, Stephens MJ, Rank M, D'Amico J, Harvey PJ, Li X, Harris RLW, Ballou EW, Anelli R, Heckman CJ, Mashimo T, Vavrek R, Sanelli L, Gorassini MA, Bennett DJ, and Fouad K.** Recovery of motoneuron and locomotor function after spinal cord injury depends on constitutive activity in 5-HT(2C) receptors. *Nat Med* 16: 694-700, 2010.
- Murray KC, Stephens MJ, Rank M, Amico J, Gorassini MA, and Bennett DJ.** Polysynaptic excitatory postsynaptic potentials that trigger spasms after spinal cord injury in rats are inhibited by 5-HT<sub>1B</sub> and 5-HT<sub>1F</sub> receptors. *J Neurophysiol* 106: 925-943, 2011.

**Nagano N, Ono H, and Fukuda H.** Functional significance of subtypes of 5-HT receptors in the rat spinal reflex pathway. *Gen Pharmacol* 19: 789-793, 1988.

**Noga BR, Johnson DMG, Riesgo MI, and Pinzon A.** Locomotor-activated neurons of the cat. I. serotonergic innervation and co-localization of 5-HT<sub>7</sub>, 5-HT<sub>2a</sub> and 5-HT<sub>1a</sub> receptors in the thoraco-lumbar spinal cord. *J Neurophysiol* 102: 1560-1576, 2009.

**Otoshi CK, Walwyn WM, Tillakaratne NJK, Zhong H, Roy RR, and Edgerton VR.** Distribution and localization of 5-HT(1A) receptors in the rat lumbar spinal cord after transection and deafferentation. *J Neurotrauma* 26: 575-584, 2009.

**Pearlstein E, Ben Mabrouk F, Pflieger JF, and Vinay L.** Serotonin refines the locomotor-related alternations in the in vitro neonatal rat spinal cord. *Eur J Neurosci* 21: 1338-1346, 2005.

**Penington NJ and Kelly JS.** Serotonin receptor activation reduces calcium current in an acutely dissociated adult central neuron. *Neuron* 4: 751-758, 1990.

**Perreault MC, Angel MJ, Guertin P, and McCreia DA.** Effects of stimulation of hindlimb flexor group II afferents during fictive locomotion in the cat. *J Physiol* 487: 211-220, 1995.

**Perrier J, Alaburda A, and Hounsgaard J.** 5-HT(1A) receptors increase excitability of spinal motoneurons by inhibiting a TASK-1-like K(+) current in the adult turtle. *J Physiol* 548: 485-492, 2003.

**Perrier J and Cotel F.** Serotonergic modulation of spinal motor control. *Curr Opin Neurobiol* 33: 1-7, 2015.

**Perrier J, Rasmussen H, Christensen R, and Petersen A.** Modulation of the intrinsic properties of motoneurons by serotonin. *Curr Pharm Des* 19: 4371-4384, 2013.

**Petersen AV, Cotel F, and Perrier J.** Plasticity of the axon initial segment: fast and slow processes with multiple functional roles. *Neuroscientist*, 2016.

**Ritchie T, Glusman S, and Haber B.** The filum terminale of the frog spinal cord, a nontransformed glial preparation: II. Uptake of serotonin. *Neurochem Res* 6: 441-452, 1981.

**Rossignol S.** Plasticity of connections underlying locomotor recovery after central and/or peripheral lesions in the adult mammals. *Philos Trans R Soc Lond B Biol Sci* 361: 1647-1671, 2006.

**Santini E and Porter JT.** M-type potassium channels modulate the intrinsic excitability of infralimbic neurons and regulate fear expression and extinction. *J Neurosci* 30: 12379-12386, 2010.

**Schmidt BJ and Jordan LM.** The role of serotonin in reflex modulation and locomotor rhythm production in the mammalian spinal cord. *Brain Res Bull* 53: 689-710, 2000.

**Seth P, Gajendiran M, and Ganguly DK.** Desensitization of spinal 5-HT<sub>1A</sub> receptors to 8-OH-DPAT: an in vivo spinal reflex study. *Neuroreport* 8: 2489-2493, 1997.

**Sethy V and Francis J.** Pharmacokinetics of buspirone as determined by ex vivo (3H)-DPAT binding. *Life Sci* 42: 1045-1048, 1988.

**Slawinska U, Miazga K, and Jordan L.** The role of serotonin in the control of locomotor movements and strategies for restoring locomotion after spinal cord injury. *Acta Neurobiol Exp* 74: 172-187, 2014.

**Takahashi T and Berger AJ.** Direct excitation of rat spinal motoneurons by serotonin. *J Physiol* 423: 63, 1990.

**Ung R-V, Rouleau P, and Guertin PA.** Functional and physiological effects of treadmill training induced by buspirone, carbidopa, and L-DOPA in clenbuterol-treated paraplegic mice. *Neurorehab Neural Repair* 26: 385-394, 2012.

**Yomono HS, Suzuki H, and Yoshioka K.** Serotonergic fibers induce a long-lasting inhibition of monosynaptic reflex in the neonatal rat spinal cord. *Neuroscience* 47: 521-531, 1992.

**Zhang L.** Effects of 5-hydroxytryptamine on cat spinal motoneurons. *Can J Physiol Pharmacol* 69: 154-163, 1991.

## Figure Caption

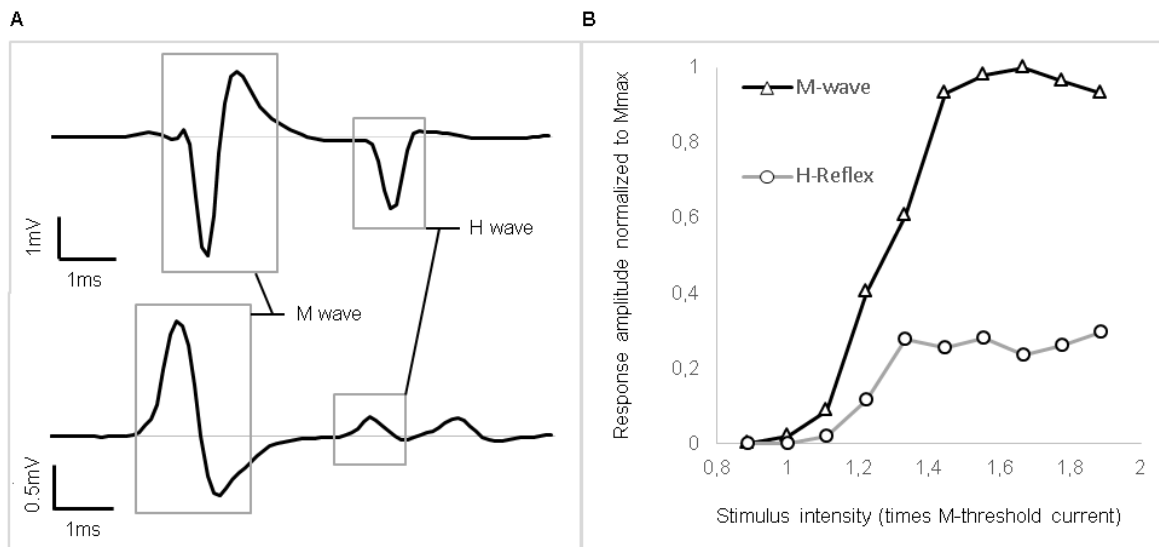

### Figure 1. Raw traces of recorded signals and representative recruitment curve

**A)** EMG examples of raw traces recorded. The M-wave is the depolarization of the whole motoneuron pool activated by stimulation, whereas the H-wave is the motor response induced by primary afferent depolarization. **B)** Peak-to-peak amplitude of EMG responses recorded in intrinsic foot muscles by progressively increasing tibial nerve stimulation intensity. This stimulus-response curve is tested to find the stimulation intensity that will allow reflex amplitude evaluation. It should be around Hmax, which specifically activates Ia primary afferents, but stable M-wave response is also necessary to ensure that the stimulation electrode is stable, at the beginning of the M-wave plateau. In this particular example, stimulation around 1.4 times the motor threshold would be chosen.



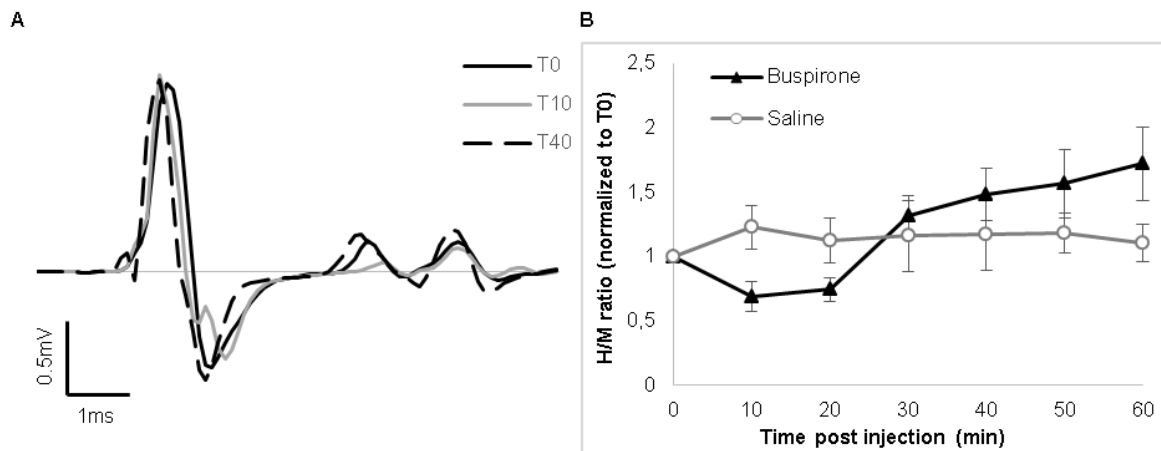

**Figure 2. Effect of buspirone on the H-reflex**

**A)** Mean traces obtained at 3 critical timepoints by averaging 30 stimulations at constant intensity in abuspirone-treated mouse. Peak-to-peak measurement of H-reflex amplitude shows an initial decrease at T10 (grey trace) vs T0 (black trace) and an increase at T40 (dotted trace). **B)** Representation of reflex amplitude evolution normalized to the pre-dose value by averaging all mice from both groups. Reflex amplitude is significantly decreased during the first 20 min post-dose and significantly increased after 40 min in buspirone-treated animals but not in saline-injected controls.

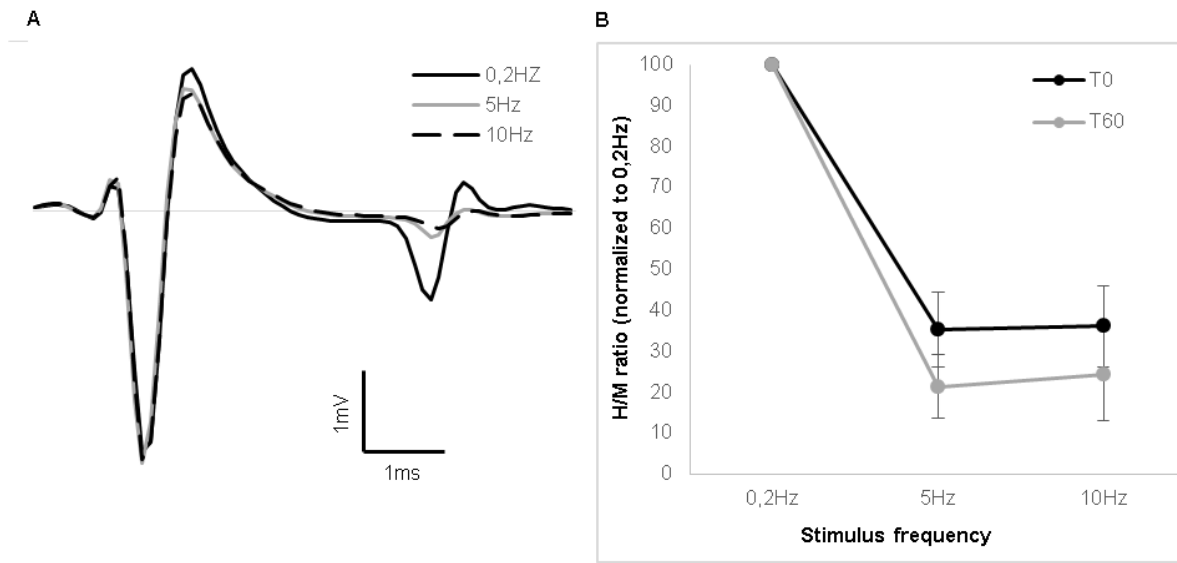

**Figure 3. Reflex inhibition at 5Hz and 10Hz**

**A)** Mean traces of 25 stimulations at 0.2 Hz, 5 Hz and 10 Hz in a mouse at pre-dose. Consistency in fiber recruitment by stimulation is assessed by stable M-wave between each trial. Only the H-reflex is depressed by stimulation frequency. **B)** Representation of mean reflex amplitude at different stimulation frequencies normalized to values at 0.2 Hz for the whole group before and 60 min after buspirone administration. Inhibition at 5 and 10 Hz does not present any significant difference between the 2 time points.
